# Supplementary material for: Adsorption of aromatic carboxylic acids on carbon nanotubes: impact of surface functionalization, molecular size and structure
Source: Royal Society of Chemistry journal article supplement (doi:10.1039/c9em00417c), 2019-01-01
Supplement: c9em00417c1.pdf [file c9em00417c1.pdf]

Adsorption of Aromatic Carboxylic Acids on Carbon Nanotubes: Impact of Surface  
Functionalization, Molecular Size and Structure

Shifan Li<sup>1</sup>, Iskinder Arsano<sup>2</sup>, Saikat Talapatra<sup>3</sup>, Mesfin Tsige<sup>2</sup>, Xingmao Ma<sup>1,\*</sup>

<sup>1</sup> Zachry Department of Civil and Environmental Engineering, Texas A&M University, 3136  
TAMU, College Station, TX 77843-3136, USA

<sup>2</sup> Department of Polymer Science, University of Akron, Akron, OH, 44325

<sup>3</sup> Department of Physics, Southern Illinois University Carbondale, Carbondale, IL, 62901

\*Corresponding Author

Zachry Department of Civil and Environmental Engineering

3136 TAMU

Texas A&M University, College Station, TX, 77843

Phone: (979) 862-1772

Email: [xma@civil.tamu.edu](mailto:xma@civil.tamu.edu)

**Table S1\***. Physiochemical Properties of three Multi-carbon Nanotube Tubes

| Compounds                | G-MWNTs                 | COOH-MWNTs              | OH-MWNTs                |
|--------------------------|-------------------------|-------------------------|-------------------------|
| Purity                   | >99.9 wt%               | > 99.9 wt%              | > 99.9 wt%              |
| Outside diameter         | 10-20 nm                | 10-20 nm                | 10-20 nm                |
| Inside diameter          | 5-10 nm                 | 5-10 nm                 | 5-10 nm                 |
| Length                   | 10-30 $\mu$ m           | 10-30 $\mu$ m           | 10-30 $\mu$ m           |
| SSA                      | > 100 m <sup>2</sup> /g | > 100 m <sup>2</sup> /g | > 100 m <sup>2</sup> /g |
| Ash content              | < 0.1 wt%               | < 0.1 wt%               | < 0.1 wt%               |
| True density             | ~2.1 g/cm <sup>3</sup>  | ~2.1 g/cm <sup>3</sup>  | ~2.1 g/cm <sup>3</sup>  |
| Functional group density | N/A                     | 1.00wt%                 | 2.48wt%                 |
| Manufacturing method     | CVD                     | CVD                     | CVD                     |

\*Selected properties of MWNTs are reported by the vendor: the US Research Nanomaterials Inc. (<https://www.us-nano.com>)

**Table S2.** Molecular structures and key chemical parameters of the organic acids investigated in this study

| Compounds | Structure                                                                           | Log $K_{ow}$ | $D_{ow}^{\#}$ | Henry constant<br>(atm·m <sup>3</sup> /mole) | pK <sub>a</sub> |
|-----------|-------------------------------------------------------------------------------------|--------------|---------------|----------------------------------------------|-----------------|
| BA        | 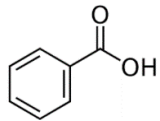   | 1.87         | -0.041        | 1.08E-007                                    | 4.19            |
| 2-NA      |    | 3.28         | 0.201         | 1.06E-008                                    | 4.16            |
| 2-AA      |    | 4.23         | 0.123         | 1.03E-009                                    | N/A             |
| 3-M-2-NA  |   | 2.79         | -0.356        | 6.26E-010                                    | 2.73            |
| 3-H-2-NA  |  | 3.05         | -0.206        | 1.06E-008                                    | 2.79            |
| 3-A-2-NA  |  | 2.54         | 0.188         | 3.74E-012                                    | 5.02            |

\*: All values listed in the table are from Chemspider unless otherwise noticed. Henry constants in this table were measured by bond method with the unit atm·m<sup>3</sup>/mole. BA: benzoic acid; 2-NA: 2-Naphthoic acid; 2-AA: 2-Anthroic acid; 3-M-2-NA: 3-Methoxy-2-Naphthoic acid; 3-H-2-NA: 2 Hydroxy-2-Naphthoic acid; 3-A-2-NA: 3-Amino-2-Naphthoic acid.

<sup>#</sup>: Estimated pH dependent octanol-water partitioning coefficient at the pH values used in this study. Detailed approach for  $D_{ow}$  estimation is elaborated in the manuscript.

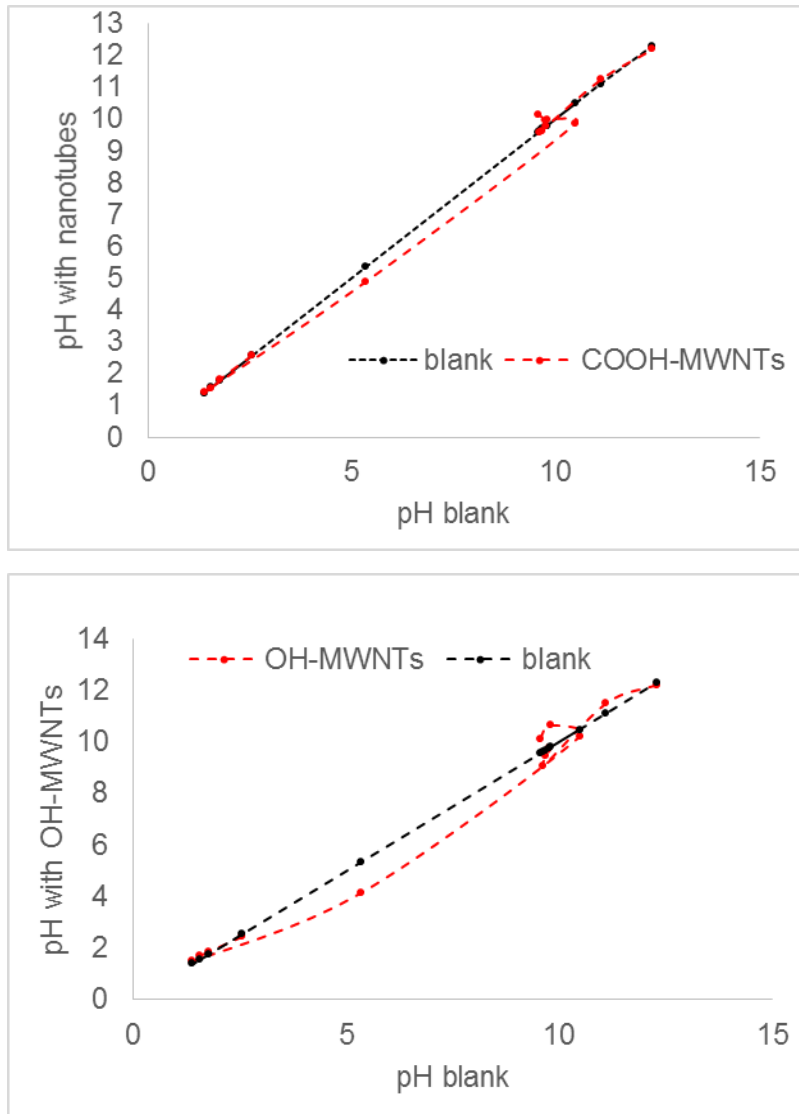

**Figure S1:** Titration curves for the determination of hydroxide ion consumption by two functionalized multi-walled carbon nanotubes (MWNTs). (A): COOH-MWNTs, (B): OH-MWNTs.
